# Supplementary material for: Temperature-driven structural evolution of carbon modified LiFePO4in air
Source: Royal Society of Chemistry journal article supplement (doi:10.1039/c5ra04744g), 2015-01-01
Supplement: c5ra04744g1.pdf [file c5ra04744g1.pdf]

## Electronic Supplementary Information

### Temperature-driven structural evolution of carbon modified LiFePO<sub>4</sub> in air atmosphere

Jiangfeng Ni <sup>\*a</sup> and Yue Wang <sup>\*b</sup>

<sup>a</sup> College of Physics, Optoelectronics and Energy, Soochow University, Suzhou 215006, China.

*E-mail address:* jeffni@suda.edu.cn

<sup>b</sup> Institute of Chemical Defense of PLA, Beijing 102205, China.

*E-mail:* wyuejms52088@sohu.com

#### Materials synthesis

Carbon coated LiFePO<sub>4</sub> was prepared via a solid-state reaction. Typically, stoichiometric amount of Li<sub>2</sub>CO<sub>3</sub> (AR), Fe(II)C<sub>2</sub>O<sub>4</sub>·2H<sub>2</sub>O (AR) and NH<sub>4</sub>H<sub>2</sub>PO<sub>4</sub> (AR) were dispersed in acetone and ground for 2 h by high energy ball milling at the inert atmosphere of N<sub>2</sub>. 2 wt% sucrose was added to the mixture prior to ball-milling. After evaporation of acetone, the resulting powder was loaded into a tube furnace, heated from room temperature to 600 °C at a heating rate of 2 °C min<sup>-1</sup>, held at this temperature for 12 h, and then cooled slowly to room temperature.

#### Materials characterization

X-ray diffraction (XRD) patterns were recorded on a Rigaku Dmax-2400 automatic diffractometer (Cu Kα) using a step scan mode, with 0.02° 2θ step size and 10 seconds for data collection for each step. Transmission electron microscopy (TEM) observation was performed on a FEI Tecnai G2 F20 microscope. Fourier transform infrared spectroscopy (FTIR) was measured on a Bruker Tensor 27 spectrometer with a 2 cm<sup>-1</sup> resolution and a 32 scans mode. X-ray photoelectron spectroscopy (XPS) was performed on a Kratos Axis Ultra spectrometer with Al Kα monochromatized X-ray source.

#### Electrochemical evaluation

Electrochemical tests were performed on a 2032-type coin cell. The working electrodes were composed of 80 wt% active material, 10 wt% acetylene black, and 10 wt% polyvinylidene fluoride binder. Li foil was used as the counter electrode and the celgard2400 microporous membrane as separator. The electrolyte is 1 mol l<sup>-1</sup> LiPF<sub>6</sub> solution dissolved in ethylene carbonate/dimethyl carbonate (1:1 by volume). Cyclic voltammetry (CV) was conducted on a CHI 660E electrochemical workstation. Galvostatic tests were carried out at 25 °C using a Land battery test system.

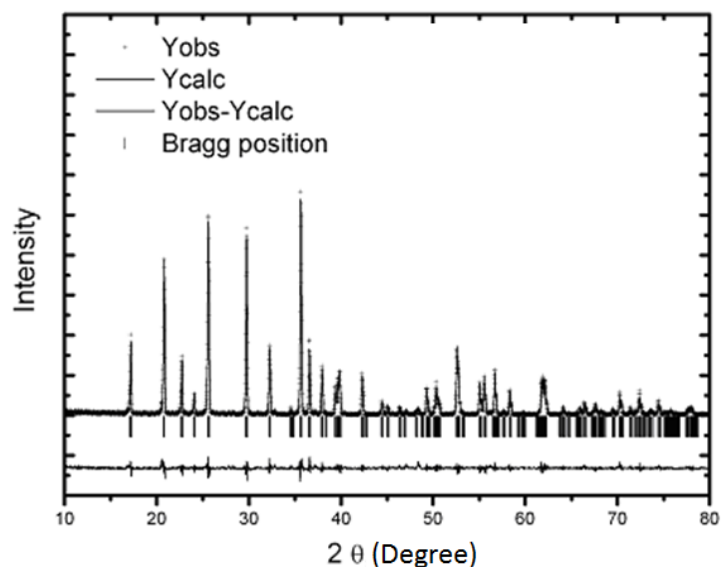

**Figure S1.** Rietveld refinement results of  $\text{LiFePO}_4$  based on the olivine structure (Pnma). The refinement gives good results as seen from the match patterns between the observed and calculated ones. Refinement merits:  $R_p = 7.01$ ,  $R_{wp} = 11.2$ ,  $S = 1.71$ .

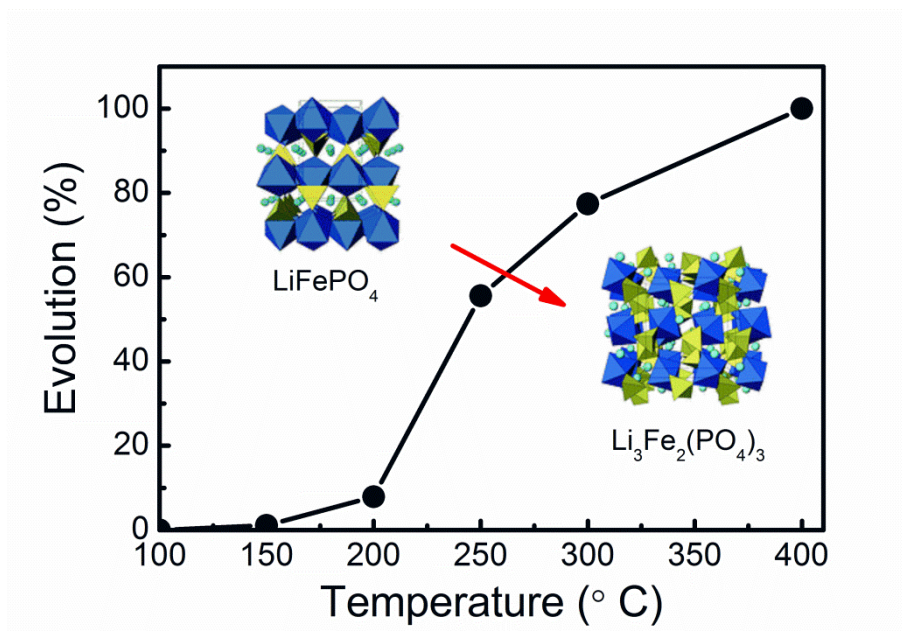

**Figure S2.** A quantitative evolution map of carbon coated  $\text{LiFePO}_4$  upon when exposed to air atmosphere.
